# Supplementary material for: In-Situ Conversion of ZnO/Ni3ZnC0.7/CNT Composite from NiZn Bimetallic MOF Precursor with Enhanced Electromagnetic Property
Source: PubMed Central journal article supplement (PMC6116268; doi:10.3390/nano8080600), 2018-08-07
Supplement: nanomaterials-08-00600-s001.pdf [file nanomaterials-08-00600-s001.pdf]

## Supporting Information

### In-situ conversion of ZnO/Ni<sub>3</sub>ZnC<sub>0.7</sub>/CNT Nanocomposite from NiZn bimetallic MOF precursor with enhanced Electromagnetic Absorbing Property

- <sup>1</sup> Shenzhen Key Laboratory of Laser Engineering, Guangdong Provincial Key Laboratory of Micro/Nano Optomechatronics Engineering, College of Optoelectronic Engineering, Shenzhen University, Shenzhen 518060, China; huanglina007@sina.com (L.H.); nkhs13313@163.com (S.H.); yangziyu@pku.edu.cn (Z.Y.); ailunzhao@outlook.com (A.Z.); scruan@szu.edu.cn (S.R.)
  - <sup>2</sup> College of Mechatronics and Control Engineering, Shenzhen University, Shenzhen 518060, China; chxliu@szu.edu.cn
  - <sup>3</sup> State Key Laboratory of Silicon Materials, School of Materials Science and Engineering, Zhejiang University, Hangzhou 310027, China; lujianguo@zju.edu.cn
- \* Correspondence: yjzeng@szu.edu.cn; Tel.; +34-913941790; Fax: +34-913941786

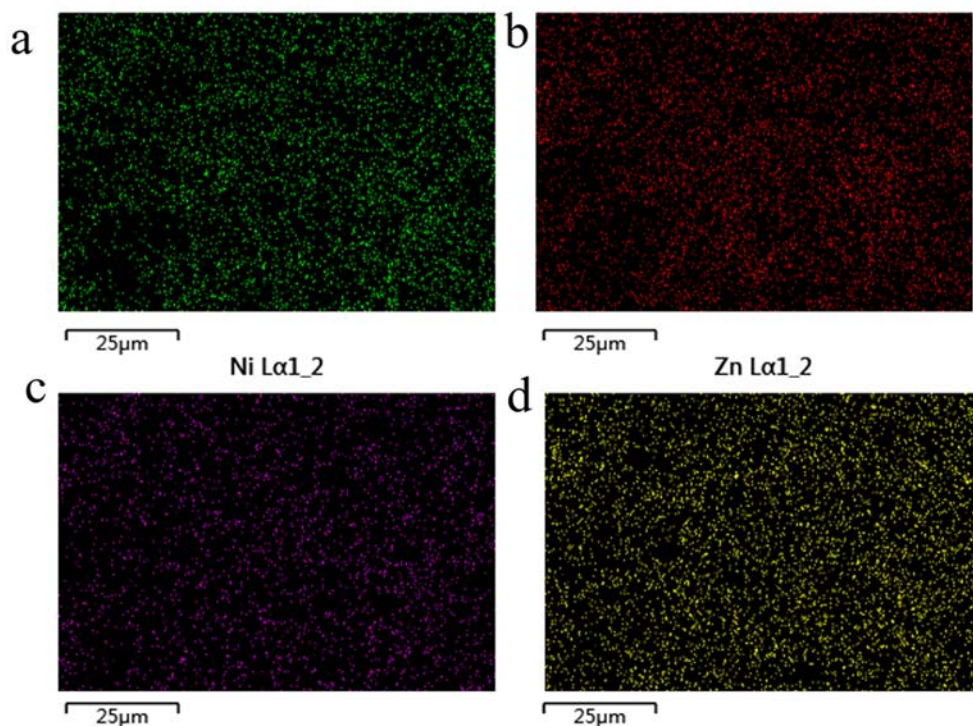

Figure S1. (a–d) elemental mapping images of 5% CNT nanocomposite.

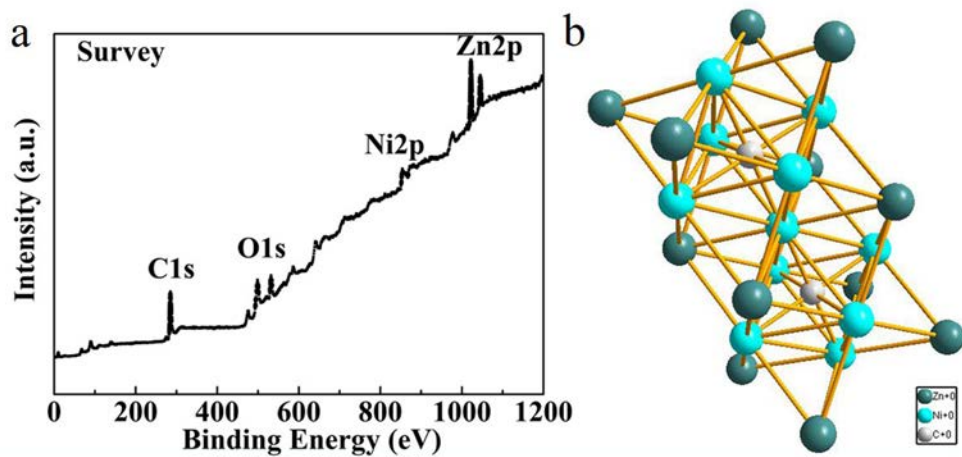

**Figure S2.** (a) XPS survey of the 5% CNT nanocomposite; (b) the crystal structure of  $\text{Ni}_3\text{ZnCo}_7$  particles.

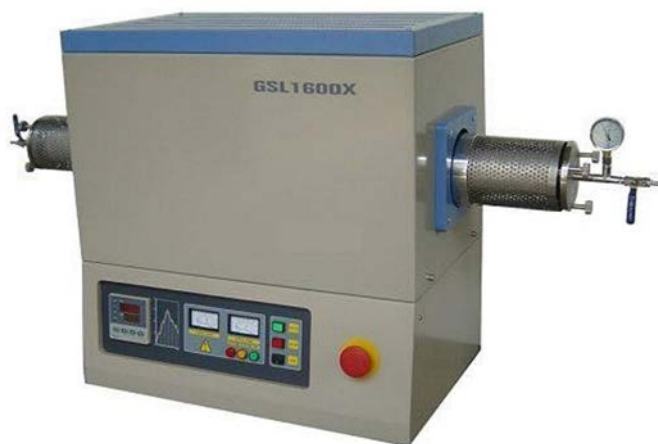

**Figure S3.** The picture of the atmosphere protection tube furnace in the experimental process.

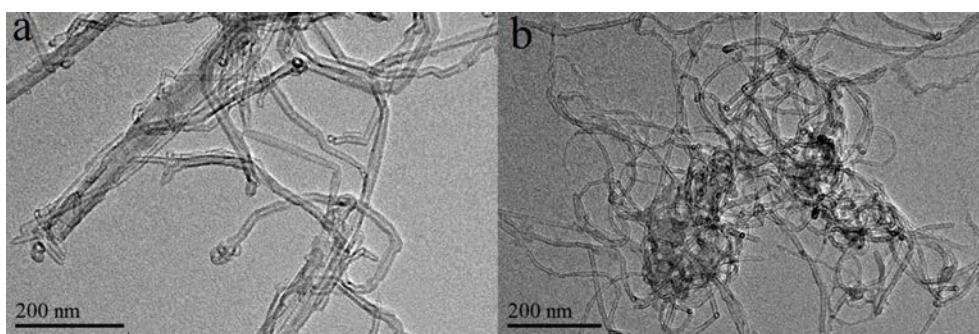

**Figure S4.** (a) TEM image of raw MWCNT; (b) TEM image of MWCNT after acid processing.

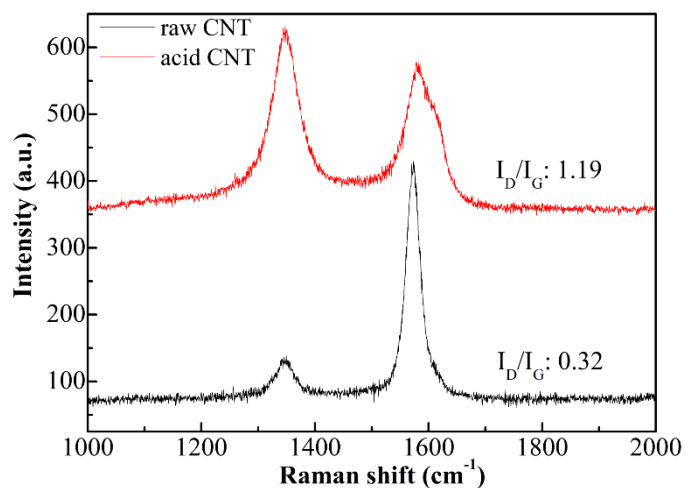

**Figure S5.** Raman spectra of raw MWCNT and acid treatment MWCNT.

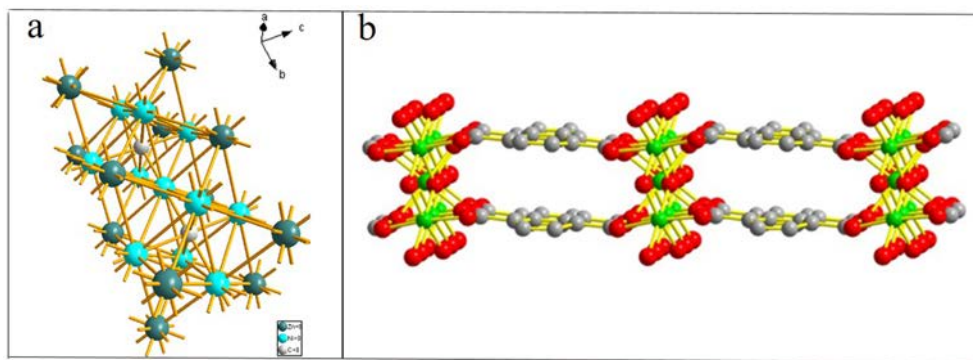

**Figure S6.** (a) The chemical structure of  $\text{Ni}_3\text{ZnCo}_{0.7}$ ; (b) The MOF structure of 638866.

**Table S1.** EDS results of the composites.

| Sample  | C (at.%) | O (at.%) | Ni (at.%) | Zn (at.%) |
|---------|----------|----------|-----------|-----------|
| 0% CNT  | 45.09    | 10.59    | 20.29     | 24.03     |
| 2% CNT  | 39.87    | 13.42    | 21.14     | 25.56     |
| 5% CNT  | 37.95    | 9.81     | 21.35     | 30.90     |
| 10% CNT | 36.90    | 9.55     | 22.19     | 31.36     |
